# Supplementary material for: Codesign of a Quality Improvement Tool for Adults With Prolonged Critical Illness: A Modified Delphi Consensus Study
Source: PubMed Central journal article supplement (PMC11390055; doi:10.1097/cce.0000000000001146), 2024-09-12
Supplement: cc9-6-e1146-s001.pdf [file cc9-6-e1146-s001.pdf]

## Supplementary material: Table 1

|                                                    |                         |                               |    |    |
|----------------------------------------------------|-------------------------|-------------------------------|----|----|
| CLINICIANS ONLY<br>Round 1 = 55<br>Round 2 = 45    | Profession              | Physiotherapist               | 15 | 14 |
|                                                    |                         | Nurse                         | 14 | 9  |
|                                                    |                         | Dietitian                     | 12 | 8  |
|                                                    |                         | Doctor                        | 7  | 7  |
|                                                    |                         | Occupational Therapist        | 5  | 3  |
|                                                    |                         | Speech and Language Therapist | 5  | 5  |
|                                                    |                         | Pharmacist                    | 3  | 2  |
|                                                    |                         | Psychologist                  | 1  | 0  |
|                                                    |                         | Other (not stated)            | 1  | 1  |
|                                                    |                         |                               |    |    |
| Years of clinical experience                       | Less than 5 years       | 20                            | 15 |    |
|                                                    | 5-10 years              | 11                            | 8  |    |
|                                                    | More than 10 years      | 32                            | 26 |    |
| Patient and family<br>Round 1 = 53<br>Round 2 = 42 | Age                     | 18-30                         | 5  | 3  |
|                                                    |                         | 31-45                         | 12 | 9  |
|                                                    |                         | 46-55                         | 10 | 9  |
|                                                    |                         | 56-65                         | 18 | 13 |
|                                                    |                         | 66-75                         | 6  | 6  |
|                                                    |                         | Over 75                       | 2  | 2  |
|                                                    |                         |                               |    |    |
| Recency of ICU stay                                | Within last 2 years     | 24                            | 18 |    |
|                                                    | 2-5 years ago           | 19                            | 10 |    |
|                                                    | More than 5 years       | 10                            | 14 |    |
|                                                    |                         |                               |    |    |
| Length of stay                                     | 7-14 days               | 13                            | 8  |    |
|                                                    | 15-31 days              | 22                            | 20 |    |
|                                                    | 1-2 months              | 12                            | 9  |    |
|                                                    | 3-6 months              | 6                             | 5  |    |
|                                                    |                         |                               |    |    |
| Family only<br>Round 1 = 8<br>Round 2 = 4          | Relationship to patient | Son or daughter               | 2  | 1  |
|                                                    |                         | Sibling                       | 2  | 0  |
|                                                    |                         | Parent                        | 2  | 2  |
|                                                    |                         | Partner                       | 2  | 1  |

Table 2 Delphi Survey: Proportions voting critical

| ACTIONABLE PROCESS OF CARE                                                                                                               | ROUND ONE PROPORTIONS VOTING CRITICAL (%) |            |           |            | ROUND TWO PROPORTIONS VOTING CRITICAL (%) |             |           |             |
|------------------------------------------------------------------------------------------------------------------------------------------|-------------------------------------------|------------|-----------|------------|-------------------------------------------|-------------|-----------|-------------|
|                                                                                                                                          | Overall                                   | Staff      | Family    | Patients   | Overall                                   | Staff       | Family    | Patients    |
| Assess and manage symptoms (i.e., pain, breathlessness, tiredness, thirst)                                                               | 103/114 (90)                              | 59/63 (94) | 8/8 (100) | 36/43 (84) | 89/89 (100)                               | 49/49 (100) | 4/4 (100) | 36/36 (100) |
| Regular physical rehabilitation (including early mobilisation) with setting and assessment of progress on weekly rehabilitation goals    | 107/113 (95)                              | 60/62 (97) | 8/8 (10)  | 39/43 (91) | 87/87 (100)                               | 48/48 (100) | 3/3 (100) | 36/36 (100) |
| Assess and treat non-respiratory muscle wasting                                                                                          | 100/113 (89)                              | 54/63 (86) | 8/8 (100) | 38/42 (90) | 85/86 (99)                                | 47/48 (98)  | 3/3 (100) | 35/35 (100) |
| Use strategies to manage excess secretions or the inability to cough up secretions                                                       | 106/110 (96)                              | 59/60 (98) | 8/8 (100) | 39/42 (93) | 85/86 (99)                                | 47/47 (100) | 4/4 (100) | 34/35 (97)  |
| Assess and treat psychological issues including anxiety, depression, and acute stress (with referral to psychiatry if required)          | 101/114 (89)                              | 53/62 (85) | 7/8 (88)  | 41/44 (93) | 85/87 (98)                                | 46/48 (96)  | 4/4 (100) | 35/35 (100) |
| Ensure adequate nutritional support                                                                                                      | 106/114 (93)                              | 62/63 (98) | 8/8 (100) | 36/43 (84) | 85/87 (98)                                | 48/48 (100) | 3/3 (100) | 34/36 (94)  |
| Provide fundamental hygiene and elimination care                                                                                         | 103/116 (89)                              | 59/63 (94) | 8/8 (100) | 36/45 (80) | 85/87 (98)                                | 47/47 (100) | 3/3 (100) | 35/37 (95)  |
| Assess readiness to deflate the tracheostomy cuff, downsize or decannulate the tracheostomy as part of the weaning process               | 88/95 (93)                                | 55/57 (96) | 6/6 (100) | 27/32 (84) | 73/76 (96)                                | 46/47 (98)  | 2/2 (100) | 25/27 (93)  |
| Assess and treat respiratory muscle weakness                                                                                             | 89/109 (82)                               | 46/60 (77) | 8/8 (100) | 35/41 (85) | 81/85 (95)                                | 44/47 (94)  | 3/3 (100) | 34/35 (97)  |
| Assess swallowing function and establish safe return to normal drinking and eating (may require referral to speech and language therapy) | 103/113 (91)                              | 59/63 (94) | 7/8 (88)  | 37/42 (88) | 81/85 (95)                                | 48/48 (100) | 2/3 (67)  | 31/34 (91)  |
| Enable appropriate and timely referral to palliative care                                                                                | 78/93 (84)                                | 52/62 (84) | 5/5 (100) | 21/26 (80) | 69/73 (95)                                | 45/47 (96)  | 2/2 (100) | 22/24 (92)  |
| Provide aids to enable patients to communicate (including method to access help) (referral to speech specialist if required)             | 92/114 (81)                               | 59/63 (94) | 8/8 (100) | 25/34 (74) | 79/83 (95)                                | 49/49 (100) | 4/4 (100) | 31/35 (89)  |
| Assess, prevent/treat complications associated with prolonged bed rest/ICU stay (i.e., pressure ulcers, constipation, DVTs)              | 102/116 (88)                              | 61/64 (95) | 7/8 (88)  | 34/44 (77) | 83/88 (94)                                | 47/48 (98)  | 3/3 (100) | 33/37 (89)  |
| Identify legal shared decision maker & ensure review/documentation of wishes, advanced directives or living will                         | 80/97 (82)                                | 54/63 (86) | 5/6 (83)  | 21/28 (75) | 73/78 (94)                                | 46/48 (96)  | 2/3 (67)  | 25/27 (93)  |
| Assess and track ventilator weaning progress                                                                                             | 94/105 (90)                               | 56/60 (93) | 5/6 (83)  | 33/39 (85) | 77/83 (93)                                | 42/45 (93)  | 2/3 (67)  | 31/33 (94)  |
| Minimize practices such as night-time light/noise that promote delirium                                                                  | 89/113 (79)                               | 53/63 (84) | 5/8 (63)  | 31/42 (74) | 81/87 (93)                                | 48/49 (98)  | 4/4 (100) | 29/34 (85)  |
| Assess/prevent ocular disorders arising from incomplete eyelid closure                                                                   | 80/98 (82)                                | 52/61 (85) | 7/7 (100) | 21/30 (70) | 69/75 (92)                                | 45/46 (98)  | 2/2 (100) | 22/27 (81)  |
| Review ongoing need for drugs used for sedation and decrease their use as able                                                           | 91/108 (84)                               | 58/62 (94) | 7/7 (100) | 26/39 (67) | 78/85 (92)                                | 48/49 (98)  | 3/3 (100) | 27/33 (82)  |
| Appropriate and timely discharge planning (discuss and arrange safe transitions in care location)                                        | 94/112 (84)                               | 54/63 (86) | 6/8 (75)  | 34/41 (83) | 79/87 (91)                                | 44/48 (92)  | 3/3 (100) | 32/36 (89)  |
| Provide regular oral care including toothbrushing                                                                                        | 99/116 (85)                               | 60/63 (95) | 8/8 (100) | 31/45 (69) | 79/87 (91)                                | 47/47 (100) | 3/3 (100) | 29/37 (78)  |

|                                                                                                                                                                            |             |            |           |            |            |            |           |            |
|----------------------------------------------------------------------------------------------------------------------------------------------------------------------------|-------------|------------|-----------|------------|------------|------------|-----------|------------|
| Assess endocrine function and treat endocrine dysfunction such as hyperglycemia and hypothyroidism                                                                         | 72/92 (78)  | 45/58 (78) | 6/6 (100) | 21/28 (75) | 64/71 (90) | 42/45 (93) | 2/2 (100) | 20/24 (83) |
| Identify and use patient preferences for strategies to promote sleep                                                                                                       | 84/111 (76) | 48/62 (77) | 8/8 (100) | 28/41 (68) | 76/87 (87) | 45/49 (92) | 3/3 (100) | 28/35 (80) |
| Involve the patient in bedside rounds and goals of care discussions as early as able                                                                                       | 88/114 (77) | 51/63 (81) | 8/8 (100) | 29/43 (67) | 77/89 (87) | 42/49 (86) | 4/4 (100) | 31/36 (86) |
| Enable continuity of care using shared interprofessional goals agreed with family and patient where possible                                                               | 86/113 (76) | 48/63 (76) | 6/8 (75)  | 32/42 (76) | 72/87 (83) | 40/48 (83) | 3/3 (100) | 29/36 (81) |
| Provide regular proactive family meetings to set goals, devise a care plan, and share information                                                                          | 84/114 (74) | 47/63 (75) | 8/8 (100) | 30/43 (70) | 70/84 (83) | 41/48 (85) | 3/3 (100) | 26/33 (79) |
| Use a structured tool (i.e. weaning protocol or individualized weaning plan) to plan and guide weaning developed by the ICU team                                           | 76/99 (77)  | 50/58 (86) | 2/5 (40)  | 24/35 (69) | 69/83 (83) | 43/47(91)  | 0/3 (0)   | 26/33 (79) |
| Conduct interprofessional team meetings to discuss patient and family-centered care plan                                                                                   | 84/114 (74) | 50/63 (79) | 5/8 (63)  | 29/43 (67) | 70/87 (80) | 39/48 (81) | 3/3 (100) | 28/36 (78) |
| Preparing patient for more independence where possible, for example encouraging self-care activities, reducing observations (may require referral to occupational therapy) | 82/114 (72) | 51/63 (81) | 4/8 (50)  | 27/43 (63) | 67/86 (78) | 39/47 (83) | 2/3 (67)  | 26/36 (72) |
| Use patient diary to aid communication with and provide psychological support for patient and family                                                                       | 79/111 (71) | 40/63 (63) | 5/8 (63)  | 34/40 (85) | 65/87 (75) | 34/49 (69) | 2/4 (50)  | 29/34 (85) |
| Enable access to activities (radio, tv, iPad) and personal possessions (including clothes) to prevent boredom, loneliness, and restore normality                           | 74/115 (64) | 52/64 (81) | 5/8 (63)  | 17/43 (40) | 64/87 (74) | 41/48 (85) | 2/3 (67)  | 21/36 (58) |
| De-escalate (including change to oral instead of IV drugs) or stop ICU pharmacotherapy and restart previous comorbidity pharmacotherapy                                    | 70/101 (69) | 43/60 (72) | 5/7 (71)  | 22/34 (65) | 59/80 (74) | 34/46 (74) | 2/2 (100) | 23/32 (72) |
| Provide activities to promote cognitive stimulation based on patient preferences                                                                                           | 74/115 (64) | 45/64 (70) | 5/8 (63)  | 24/43 (56) | 64/86 (74) | 40/48 (83) | 2/3 (67)  | 22/35 (63) |
| Ensure access to outside space where possible                                                                                                                              | 71/115 (62) | 46/64 (72) | 6/8 (75)  | 19/43 (44) | 59/87 (68) | 35/48 (73) | 2/3 (67)  | 22/36 (61) |
| Include the patient (when able) and family in the development of the weaning plan                                                                                          | 66/107 (62) | 33/60 (55) | 6/8 (75)  | 27/39 (69) | 56/87 (64) | 28/48 (58) | 3/4 (75)  | 25/35 (71) |
| Family participation in care and occupation tasks                                                                                                                          | 71/113 (63) | 38/62 (61) | 4/8 (50)  | 29/43 (67) | 52/84 (62) | 29/47 (62) | 2/3 (67)  | 21/34 (62) |
| Provide access to social support such as a social worker; or signposting to sources of support and advice agencies (patient and family)                                    | 62/110 (56) | 32/62 (52) | 4/7 (57)  | 26/41 (63) | 50/87 (57) | 25/48 (52) | 3/4 (75)  | 22/35 (63) |
| Minimising visiting restrictions                                                                                                                                           | 59/115 (51) | 32/63 (51) | 4/8 (50)  | 23/44 (52) | 48/84 (55) | 26/47 (55) | 2/3 (67)  | 23/35 (66) |
| Family presence or participation in rounds and planning meetings                                                                                                           | 58/114 (51) | 29/63 (46) | 4/8 (50)  | 25/43 (58) | 43/86 (50) | 17/48 (35) | 3/3 (100) | 23/35 (62) |
| Limit physiologic monitoring and routine blood tests                                                                                                                       | 34/111 (31) | 24/63 (38) | 2/8 (20)  | 8/40 (20)  | 16/87 (18) | 12/48 (25) | 1/3 (33)  | 5/36 (14)  |

## Supplementary material: Table 3

| ACTIONABLE PROCESS OF CARE                                                                                                               | ROUND ONE MEANS (SD) |           |           |           | ROUND TWO MEANS (SD) |           |           |           |
|------------------------------------------------------------------------------------------------------------------------------------------|----------------------|-----------|-----------|-----------|----------------------|-----------|-----------|-----------|
|                                                                                                                                          | Overall              | Staff     | Family    | Patients  | Overall              | Staff     | Family    | Patients  |
| Assess and manage symptoms (i.e., pain, breathlessness, tiredness, thirst)                                                               | 8.1 (1.1)            | 8.2 (1)   | 8.5 (0.8) | 7.8 (1.3) | 8.5 (0.7)            | 8.7 (0.6) | 8.4 (0.8) | 8.5 (1)   |
| Assess and treat psychological issues including anxiety, depression, and acute stress (with referral to psychiatry if required)          | 8.1 (1.1)            | 8 (1.2)   | 8.5 (1.1) | 8.2 (1.1) | 8.5 (0.9)            | 8.4 (1)   | 8.5 (0.7) | 8.5 (1)   |
| Ensure adequate nutritional support                                                                                                      | 8.2 (1)              | 8.5 (0.8) | 8.3 (0.9) | 7.8 (1.2) | 8.5 (0.9)            | 8.7 (0.6) | 8.3 (1.1) | 8.7 (0.6) |
| Provide aids to enable patients to communicate (including method to access help) (referral to speech specialist if required)             | 8.1 (1.2)            | 8.2 (1)   | 8.3 (0.9) | 7.8 (1.4) | 8.5 (0.9)            | 8.7 (0.7) | 8.3 (1.1) | 8.5 (1)   |
| Provide fundamental hygiene and elimination care                                                                                         | 8 (1.2)              | 8.2 (1.1) | 8.4 (0.7) | 7.8 (1.4) | 8.5 (0.8)            | 8.6 (0.7) | 8.3 (0.6) | 8.4 (0.9) |
| Regular physical rehabilitation (including early mobilisation) with setting and assessment of progress on weekly rehabilitation goals    | 8.2 (1.1)            | 8.3 (0.9) | 8.3 (0.9) | 7.9 (1.3) | 8.5 (0.7)            | 8.6 (0.7) | 7.7 (0.6) | 8.4 (0.8) |
| Assess and treat non-respiratory muscle wasting                                                                                          | 8.0 (1.1)            | 8.0 (1.1) | 8.1 (1)   | 8.1 (1.1) | 8.4 (0.8)            | 8.5 (0.8) | 8.4 (0.8) | 7.7 (0.6) |
| Assess swallowing function and establish safe return to normal drinking and eating (may require referral to speech and language therapy) | 8.2 (1)              | 8.4 (0.9) | 8.1 (1.1) | 8 (1.1)   | 8.4 (0.9)            | 8.7 (0.7) | 8.2 (1.1) | 8 (1.7)   |
| Use strategies to manage excess secretions or the inability to cough up secretions                                                       | 8.1 (1)              | 8.2 (0.9) | 8.4 (0.7) | 7.9 (1.1) | 8.4 (0.9)            | 8.5 (0.8) | 8.3 (1)   | 8.3 (0.5) |
| Assess, prevent/treat complications associated with prolonged bed rest/ICU stay (i.e., pressure ulcers, constipation, DVTs)              | 7.9 (1.2)            | 8.1 (1)   | 8.4 (1.1) | 7.6 (1.5) | 8.3 (1)              | 8.4 (0.8) | 8.1 (1.1) | 8.7 (0.6) |
| Assess readiness to deflate the tracheostomy cuff, downsize or decannulate the tracheostomy as part of the weaning process               | 8 (1)                | 8.2 (0.9) | 8.2 (0.8) | 7.7 (1.1) | 8.3 (1)              | 8.4 (1)   | 8.1 (1)   | 7.5 (0.7) |
| Enable appropriate and timely referral to palliative care                                                                                | 7.9 (1.3)            | 8 (1.3)   | 8.4 (0.9) | 7.7 (1.3) | 8.3 (1)              | 8.4 (1.1) | 8.2 (1)   | 9 (0)     |
| Review ongoing need for drugs used for sedation and decrease their use as able                                                           | 7.9 (1.2)            | 8.3 (1)   | 8.1 (0.7) | 7.4 (1.4) | 8.3 (1)              | 8.5 (0.8) | 7.9 (1.2) | 7.7 (0.6) |
| Assess and treat respiratory muscle weakness                                                                                             | 7.7 (1.3)            | 7.6 (1.3) | 7.9 (0.8) | 7.8 (1.3) | 8.2 (1)              | 8.1 (1.1) | 8.3 (0.8) | 8 (0)     |
| Involve the patient in bedside rounds and goals of care discussions as early as able                                                     | 7.7 (1.4)            | 7.8 (1.2) | 8.8 (0.5) | 7.3 (1.6) | 8.2 (1.1)            | 8.2 (1.1) | 8.8 (0.5) | 8.1 (1.2) |
| Minimize practices such as night-time light/noise that promote delirium                                                                  | 7.8 (1.3)            | 7.8 (1.1) | 7.3 (1.8) | 7.8 (1.4) | 8.2 (1)              | 8.3 (0.9) | 8.2 (1.2) | 7.5 (0.6) |
| Provide regular oral care including toothbrushing                                                                                        | 7.8 (1.2)            | 8.1 (1)   | 8 (0.9)   | 7.4 (1.4) | 8.2 (1)              | 8.5 (0.8) | 8 (1)     | 7.9 (1.2) |
| Assess and track ventilator weaning progress                                                                                             | 7.9 (1.3)            | 8.1 (1.1) | 7.2 (1.3) | 7.7 (1.4) | 8.1 (1.2)            | 8.3 (1.1) | 8.1 (1.2) | 6.3 (1.2) |
| Identify legal shared decision maker & ensure review/documentation of wishes, advanced directives or living will                         | 7.7 (1.3)            | 7.8 (1.3) | 7.8 (1.6) | 7.6 (1.5) | 8.1 (1)              | 8.2 (1)   | 7 (1.8)   | 8.2 (1)   |

|                                                                                                                                                                            |           |           |           |           |           |           |           |           |
|----------------------------------------------------------------------------------------------------------------------------------------------------------------------------|-----------|-----------|-----------|-----------|-----------|-----------|-----------|-----------|
| Identify and use patient preferences for strategies to promote sleep                                                                                                       | 7.6 (1.4) | 7.7 (1.2) | 7.9 (1)   | 7.4 (1.6) | 8 (1.1)   | 8.1 (1.1) | 8 (1)     | 7.7 (1.2) |
| Appropriate and timely discharge planning (discuss and arrange safe transitions in care location)                                                                          | 7.7 (1.2) | 7.8 (1.2) | 7.4 (1.1) | 7.6 (1.3) | 7.9 (1.1) | 7.9 (1.1) | 7.8 (1.2) | 8 (1)     |
| Use a structured tool (i.e. weaning protocol or individualized weaning plan) to plan and guide weaning developed by the ICU team                                           | 7.6 (1.3) | 7.8 (1.2) | 6.8 (1.3) | 7.3 (1.5) | 7.8 (1.3) | 8.1 (0.8) | 5.3 (0.5) | 7.7 (1)   |
| Assess/prevent ocular disorders arising from incomplete eyelid closure                                                                                                     | 7.5 (1.4) | 7.6 (1.3) | 8.1 (0.9) | 7.2 (1.5) | 7.7 (1.1) | 7.9 (0.9) | 7.4 (1.4) | 8 (1.4)   |
| Conduct interprofessional team meetings to discuss patient and family-centered care plan                                                                                   | 7.4 (1.4) | 7.6 (1.3) | 7.1 (1.5) | 7.2 (1.5) | 7.7 (1.3) | 7.8 (1.3) | 7.4 (1.3) | 8.7 (0.6) |
| Enable continuity of care using shared interprofessional goals agreed with family and patient where possible                                                               | 7.5 (1.3) | 7.6 (1.2) | 7.6 (1.3) | 7.3 (1.4) | 7.7 (1.2) | 7.8 (1.2) | 7.6 (1.2) | 8.3 (1.2) |
| Provide regular proactive family meetings to set goals, devise a care plan, and share information                                                                          | 7.4 (1.5) | 7.4 (1.4) | 8.1 (1)   | 7.3 (1.7) | 7.7 (1.3) | 7.8 (1.3) | 8.3 (1.2) | 7.5 (1.2) |
| Enable access to activities (radio, tv, iPad) and personal possessions (including clothes) to prevent boredom, loneliness, and restore normality                           | 7.1 (1.8) | 7.7 (1.3) | 6.9 (2.1) | 6.1 (2)   | 7.6 (1.4) | 8 (1.2)   | 7 (1.6)   | 7.3 (1.2) |
| Use patient diary to aid communication with and provide psychological support for patient and family                                                                       | 7.4 (1.5) | 7.2 (1.5) | 7.1 (1.1) | 7.8 (1.4) | 7.6 (1.4) | 7.4 (1.5) | 8 (1.2)   | 7.3 (1.5) |
| Assess endocrine function and treat endocrine dysfunction such as hyperglycemia and hypothyroidism                                                                         | 7.3 (1.6) | 7.2 (1.5) | 8.5 (0.8) | 7 (1.8)   | 7.5 (1.3) | 7.4 (1.2) | 7.5 (1.5) | 8 (1.4)   |
| Preparing patient for more independence where possible, for example encouraging self-care activities, reducing observations (may require referral to occupational therapy) | 7.3 (1.5) | 7.7 (1.2) | 6.8 (2.3) | 6.9 (1.5) | 7.5 (1.3) | 7.8 (1.2) | 7 (1)     | 7.2 (1.4) |
| Provide activities to promote cognitive stimulation based on patient preferences                                                                                           | 7.2 (1.6) | 7.5 (1.4) | 7.6 (1.7) | 6.7 (1.9) | 7.5 (1.4) | 7.8 (1.2) | 7.7 (1.5) | 7.1 (1.6) |
| De-escalate (including change to oral instead of IV drugs) or stop ICU pharmacotherapy and restart previous comorbidity pharmacotherapy                                    | 7.3 (1.4) | 7.4 (1.3) | 7 (1.7)   | 7 (1.5)   | 7.3 (1.3) | 7.3 (1.2) | 7.3 (1.3) | 6 (1.7)   |
| Ensure access to outside space where possible                                                                                                                              | 7 (1.6)   | 7.4 (1.3) | 7.5 (1.5) | 6.5 (1.9) | 7.3 (1.5) | 7.5 (1.3) | 6.9 (1.7) | 7.3 (1.5) |
| Include the patient (when able) and family in the development of the weaning plan                                                                                          | 7.1 (1.6) | 6.9 (1.6) | 7.3 (1.4) | 7.3 (1.6) | 7.3 (1.6) | 7 (1.5)   | 8.3 (1.5) | 7.5 (1.7) |
| Family participation in care and occupation tasks                                                                                                                          | 7.1 (1.5) | 7.1 (1.4) | 7 (1.3)   | 7.3 (1.8) | 7.2 (1.4) | 7 (1.4)   | 7.4 (1.4) | 7.7 (1.5) |
| Provide access to social support such as a social worker; or signposting to sources of support and advice agencies (patient and family)                                    | 6.9 (1.7) | 6.8 (1.7) | 6.7 (1.1) | 7.1 (1.9) | 7 (1.6)   | 6.7 (1.3) | 7.1 (1.9) | 7.8 (1.5) |
| Minimising visiting restrictions                                                                                                                                           | 6.5 (2.1) | 6.5 (1.9) | 6.5 (2.1) | 6.4 (2.5) | 6.8 (2.1) | 6.9 (1.9) | 7.3 (1.5) | 6.7 (2.4) |
| Family presence or participation in rounds and planning meetings                                                                                                           | 6.6 (1.5) | 6.3 (1.4) | 7 (1.5)   | 6.8 (1.7) | 6.6 (1.3) | 6.1 (1.1) | 7.2 (1.4) | 8.3 (0.6) |
| Limit physiologic monitoring and routine blood tests                                                                                                                       | 5.8 (1.8) | 6.2 (1.6) | 5.6 (2.1) | 5.2 (2)   | 5.6 (1.5) | 6 (1.2)   | 5.7 (1.5) | 5 (1.7)   |

## Supplementary information: Figure 1

### Prolonged ICU stay care plan – how each item was included

| TOPIC                                                                            | ITEM                                                                                                                                                                                                             | METHOD OF INCLUSION                                                                     |
|----------------------------------------------------------------------------------|------------------------------------------------------------------------------------------------------------------------------------------------------------------------------------------------------------------|-----------------------------------------------------------------------------------------|
| 1. INVOLVING PATIENT AND FAMILY IN GOAL SETTING AND DECISION MAKING              | a. Involve patient in bedside rounds/goals of care discussions as early as able                                                                                                                                  | Rated > 8 in Delphi survey                                                              |
|                                                                                  | b. Provide regular proactive family meetings to set goals, devise a care plan, and share information.<br>Last family update: _____                                                                               | Rated for inclusion in Consensus meeting                                                |
|                                                                                  | c. Identify legal shared decision maker & ensure review/documentation of wishes, advanced directives or living will                                                                                              | Rated > 8 in Delphi survey                                                              |
| 2. PROVIDE AIDS TO ENABLE PATIENT TO COMMUNICATE (INCLUDE METHOD TO ACCESS HELP) |                                                                                                                                                                                                                  | Rated > 8 in Delphi survey                                                              |
| 3. PROMOTE PHYSICAL COMFORT AND MINIMIZE COMPLICATIONS                           | a. Prevent/treat complications associated with prolonged bed rest/ICU stay (i.e., pressure ulcers, constipation, DVTs)                                                                                           | Rated > 8 in Delphi survey                                                              |
|                                                                                  | b. Provide regular oral care including toothbrushing                                                                                                                                                             | Rated > 8 in Delphi survey                                                              |
|                                                                                  | c. Provide fundamental hygiene and elimination care                                                                                                                                                              | Rated > 8 in Delphi survey                                                              |
|                                                                                  | d. Assess/manage symptoms (pain, breathlessness, tiredness, thirst)                                                                                                                                              | Rated > 8 in Delphi survey                                                              |
|                                                                                  | e. Ensure adequate nutritional support                                                                                                                                                                           | Rated > 8 in Delphi survey                                                              |
| 4. PROMOTE SELF-CARE AND RESTORE NORMALCY                                        | a. Enable access to activities (radio, tv, iPad) and personal possessions (including clothes) to prevent boredom, delirium, loneliness, and restore normality - might require a referral to Occupational Therapy | MERGED ITEM – suggested in consensus meeting                                            |
|                                                                                  | b. Use patient diary to aid communication with and provide psychological support for patient and family                                                                                                          | Included by research team due to evidence for use in UK ICUs                            |
| 5. OPTIMIZE VENTILATOR WEANING                                                   | a. Track and guide ventilator weaning using a structured tool (protocol/individualized weaning plan)                                                                                                             | MERGED ITEM:<br>Assess and track ventilatory weaning progress rated >8 in Delphi survey |

|                                                                                                                                                    |                                                                                                                                                        |                                                                                                                                                      |
|----------------------------------------------------------------------------------------------------------------------------------------------------|--------------------------------------------------------------------------------------------------------------------------------------------------------|------------------------------------------------------------------------------------------------------------------------------------------------------|
|                                                                                                                                                    |                                                                                                                                                        | Use a structured tool – included by research team due to evidence for use in ICU                                                                     |
|                                                                                                                                                    | b. Assess causes of weaning failure, including respiratory muscle weakness (provide respiratory muscle training as appropriate) and endocrine function | MERGED ITEM: Assess and treat respiratory muscle weakness rated >8 in Delphi survey, and review of endocrine function included due to evidence base. |
|                                                                                                                                                    | c. Assess readiness to deflate the tracheostomy cuff, downsize or decannulate the tracheostomy as part of the weaning process                          | Rated > 8 in Delphi survey                                                                                                                           |
|                                                                                                                                                    | d. Use strategies to manage excess secretions/inability to cough up secretions                                                                         | Rated > 8 in Delphi survey                                                                                                                           |
| 6. OPTIMIZE PHYSICAL RECOVERY                                                                                                                      | a. Regular physical rehabilitation (including early mobilisation) with setting and assessment of progress on weekly rehabilitation goals)              | Rated > 8 in Delphi survey                                                                                                                           |
|                                                                                                                                                    | b. Assess and treat non-respiratory muscle wasting                                                                                                     | Rated > 8 in Delphi survey                                                                                                                           |
| 7. ASSESS SWALLOWING FUNCTION AND ESTABLISH SAFE RETURN TO NORMAL DRINKING AND EATING<br>- might require a referral to Speech and Language Therapy |                                                                                                                                                        | Rated > 8 in Delphi survey                                                                                                                           |
| 8. DE-ESCALATE (INCLUDING CHANGE TO ORAL INSTEAD OF IV DRUGS) OR STOP ICU PHARMACOTHERAPY AND RESTART PREVIOUS COMORBIDITY PHARMACOTHERAPY)        |                                                                                                                                                        | Included by research team due to evidence base for poor implementation in practice                                                                   |
| 9. ASSESS AND TREAT PSYCHOLOGICAL ISSUES INCLUDING ANXIETY, DEPRESSION, AND ACUTE STRESS<br>- might require a referral to Psychology               |                                                                                                                                                        | Rated > 8 in Delphi survey                                                                                                                           |
| 10. MINIMIZE DELIRIUM RISK                                                                                                                         | a. Use patient preferences for strategies to promote sleep, including reducing night-time light/noise                                                  | MERGED ITEM -both items rated > 8 in Delphi survey                                                                                                   |
|                                                                                                                                                    | b. Review ongoing need for sedation and decrease as able                                                                                               | Rated > 8 in Delphi survey                                                                                                                           |
| 11. ENSURE CONTINUITY IN CARE                                                                                                                      | a. Conduct interprofessional team meetings to discuss patient- and family-centered care plan and setting interprofessional goals                       | MERGED ITEM – suggested in consensus meeting                                                                                                         |
|                                                                                                                                                    | b. Appropriate and timely discharge planning (discuss and arrange safe transitions in care location)                                                   | Rated for inclusion in Consensus meeting                                                                                                             |
|                                                                                                                                                    | c. Enable appropriate and timely referral to palliative care                                                                                           | Rated > 8 in Delphi survey                                                                                                                           |
